# Supplementary material for: Screening for Referral of Serious Pathology by Physical Examination Tests in Patients with Back or Chest Pain: A Systematic Review
Source: MDPI journal article supplement (doi:10.3390/ijerph192416418), 2022-12-07
Supplement: s1 [file s1]

## Supplementary S1. Altered reference values for PETs

|                            |                                                                                                                                                                    |
|----------------------------|--------------------------------------------------------------------------------------------------------------------------------------------------------------------|
| Body Temperature           | > 37.5°                                                                                                                                                            |
| Blood Pressure             | > 140 mmHG – 90 mmHg or < 90 mmHg -60 mmHg                                                                                                                         |
| Heartbeat                  | >100 bpm or < 50 bpm                                                                                                                                               |
| Respiratory frequency      | >20 respiratory acts or < 12 respiratory acts                                                                                                                      |
| Saturation                 | < 95%                                                                                                                                                              |
| Babinski                   | Presence of Babinski's sign in the plantar skin reflex                                                                                                             |
| Reflex                     | Diminished or absent osteotendinous reflexes                                                                                                                       |
| Sensory                    | Markedly altered sensitivity (if the assessor defines the sensitivity deficit as "mild", the test will not be consider positive)                                   |
| Strength                   | Muscle strength $\leq$ 3/5 MRC                                                                                                                                     |
| SLR test                   | SLR test causes patient reported symptom                                                                                                                           |
| SLUMP test                 | SLUMP test causes patient reported symptom                                                                                                                         |
| Abdominal palpation        | Palpation causes pain or detects abnormalities                                                                                                                     |
| Costal/Vertebral palpation | Palpation of the sternum, ribs, pelvic girdle, sacrum, or thoracic and/or lumbar vertebrae causes pain                                                             |
| Lymph node palpation       | Palpation causes pain or detects abnormalities                                                                                                                     |
| Mass                       | Inspection or palpation detect the presence of an abnormal mass, painful or not                                                                                    |
| Pulsatile Mass             | Inspection or palpation detect the presence of a pulsatile mass, painful or not                                                                                    |
| Cardiac auscultation       | Auscultation detects abnormalities compared to physiological sounds                                                                                                |
| Pulmonary auscultation     | Auscultation detects abnormalities compared to physiological sounds                                                                                                |
| Inspection                 | Inspection detects the presence of jaundice, cyanosis, digital clubbing, edema, skin lesions or any alteration that could lead to suspicion of a serious pathology |
| ROM                        | Presence of patient-referred pain or a deficit > 25% in passive range of motion (PROM) or active range of motion (AROM) of any joint in the body                   |
| Pressure difference in UL  | Difference > 10 mmHG in measuring the blood pressure of both UL                                                                                                    |
| Pulmonary percussion       | Pulmonary percussion produces non-physiological sounds                                                                                                             |
| Anal/Rectal examination    | Altered anal tone                                                                                                                                                  |
| Abdominal auscultation     | Auscultation detects abnormalities compared to physiological sounds                                                                                                |
| Faber test                 | Faber test causes patient reported symptom                                                                                                                         |
| Bicycle test               | Bicycle test (or Van Gelderen test) modifies the patient reported symptom or modifies the patient peripheral arterial pulses.                                      |
| Close fist percussion test | Close fist percussion test causes patient reported symptom                                                                                                         |
| Supine sign                | Supine position causes patient reported symptom                                                                                                                    |
| Bone percussion            | Percussion on a bony protuberance causes patient reported symptom                                                                                                  |
| Tuning fork test           | Application of tuning fork on a bony protuberance causes pain                                                                                                      |
| Psoas test                 | Psoas test causes patient reported symptom                                                                                                                         |
| Subcutaneous emphysema     | Skin palpation detects a crepitus                                                                                                                                  |
| Romberg                    | The patient strongly falters or falls in the first 30 seconds of the test                                                                                          |
| Tinel's sign               | Peripheric nerve palpation causes patient reported symptom                                                                                                         |
| Sacroiliac compression     | Sacroiliac joint compression causes patient reported symptom                                                                                                       |
| Altered muscle tone        | Ashworth scale > 1                                                                                                                                                 |
| Mennel's sign              | test causes patient reported symptom                                                                                                                               |
| Lhermitte's sign           | test causes patient reported symptom                                                                                                                               |
| Beavor's sign              | During the test, only the upper part of the rectus abdominis contracts pulling the navel towards the head.                                                         |

The values that determined the positivity or negativity of each physical examination test. SLR: Straight Leg Raise; ROM: Range of Motion; PROM: Passive Range of Motion; AROM: Active Range of Motion; MRC: Medical Research council; UL: Upper Limbs; FABER: Flexion Abduction External Rotation.
