# Supplementary material for: Screening for Referral of Serious Pathology by Physical Examination Tests in Patients with Back or Chest Pain: A Systematic Review
Source: MDPI journal article supplement (doi:10.3390/ijerph192416418), 2022-12-07
Supplement: s1 [file s1]

## Supplementary S4

The bibliographic list of 26 studies in which clinicians declared the suspicion of serious disease at the end of the physical examination

### References

- 4a. Ahmad, I.; Goyal, N.; Bhatt, C.P.; Chufal, K.S. Primary vertebral leiomyosarcoma masquerading as a nerve sheath tumour. *BMJ Case Rep.* **2017**, 2017, bcr2016217602. <https://doi.org/10.1136/bcr-2016-217602>.
- 5a. Ahmed, A.; Garba, I.; Denué, B.A.; Alkali, M.B.; Bakki, B.; Rawizza, H. Catamenial right haemothorax due to endometriosis: Two case reports. *Afr. J. Respir.* **2015**, 10, 24–26.
- 6a. Belliveau, D.J.; Weeks, A.C.; McKelvey, R.; Mulvagh, S.L. Cardiogenic Shock in a Healthy Young Woman With Acute Onset Abdominal and Chest Pain. *JACC: Case Rep.* **2020**, 2, 24–27. <https://doi.org/10.1016/j.jaccas.2019.11.066>.
- 7a. Boissonnault, W.G.; Thein-Nissenbaum, J.M. Differential Diagnosis of a Sacral Stress Fracture. *J. Orthop. Sports Phys. Ther.* **2002**, 32, 613–621. <https://doi.org/10.2519/jospt.2002.32.12.613>.
- 8a. Cabanelas, N.; Nobre, Â.; Guerra, N.; Gallego, J.; Ferreira, R.; Carvalheiro, C.; Roque, J.; Peres, M.; Siopa, L.; Martins, V.P.; et al. Images in Cardiology after clinical observation—Aortic dissection in Marfan syndrome. *Rev. Port. De Cardiol.* **2011**, 30, 735–741.
- 9a. Campos, I.D.; Salgado, A.; Azevedo, P.; Vieira, C. Dressler's syndrome: Are we underdiagnosing what we think to be rare? *BMJ Case Rep.* **2019**, 12, e227772. <https://doi.org/10.1136/bcr-2018-227772>.
- 10a. Christe, G.; Hall, T. The screening process of a patient with low back pain and suspected thoracic myelopathy: A case report. *J. Man. Manip. Ther.* **2017**, 26, 11–17. <https://doi.org/10.1080/10669817.2017.1282189>.
- 11a. Crowell, M.S.; Gill, N.W. Medical Screening and Evacuation: Cauda Equina Syndrome in a Combat Zone. *J. Orthop. Sports Phys. Ther.* **2009**, 39, 541–549. <https://doi.org/10.2519/jospt.2009.2999>.
- 12a. Erhard, R.E.; Egloff, B.P. Patient With Metastatic Adenocarcinoma Imitating Lumbar Herniated Nucleus Pulposus. *J. Manip. Physiol. Ther.* **2004**, 27, 569–573. <https://doi.org/10.1016/j.jmpt.2004.10.001>.
- 13a. Gray, J.C. Diagnosis of Intermittent Vascular Claudication in a Patient With a Diagnosis of Sciatica. *Phys. Ther.* **1999**, 79, 582–590. <https://doi.org/10.1093/ptj/79.6.582>.
- 14a. Greene, G. “Red Flags”: Essential factors in recognizing serious spinal pathology. *Man. Ther.* **2001**, 6, 253–255.
- 15a. Greenwood, M.J.; Erhard, R.E.; Jones, D.L. Differential diagnosis of the hip vs. lumbar spine: Five case reports. *J. Orthop. Sport. Phys. Ther.* **1998**, 27, 308–315.
- 16a. Harris, K.K.; Delic, J.A.; Nelson, E.O. Epidural and Paraspinal Abscess Presenting as Acute Low Back Pain.. *J. Orthop. Sports Phys. Ther.* **2019**, 49, 482–482. <https://doi.org/10.2519/jospt.2019.8456>.
- 17a. Kaufman, R. Early-Onset Multiple Myeloma: An Illustrative Case Report. *J. Manip. Physiol. Ther.* **2007**, 30, 543–549. <https://doi.org/10.1016/j.jmpt.2007.07.002>.
- 18a. Kodaira, M.; Itoh, T.; Koizumi, K.; Numasawa, Y. Giant right coronary artery aneurysm complicated by a fistula to the right atrium, mimicking a ruptured sinus of Valsalva aneurysm. *BMJ Case Rep.* **2018**, 2018, bcr2018226197. <https://doi.org/10.1136/bcr-2018-226197>.
- 19a. Laslett, M. Bilateral buttock pain caused by aortic stenosis: A case report of claudication of the buttock. *Man. Ther.* **2000**, 5, 227–233. <https://doi.org/10.1054/math.2000.0368>.
- 20a. Lyon, M.; Brannan, L.; Ciamillo, L.; Blaivas, M. False positive abdominal aortic aneurysm on bedside emergency ultrasound. *J. Emerg. Med.* **2004**, 26, 193–196. <https://doi.org/10.1016/j.jemermed.2003.08.012>.
- 21a. Martínez, M.; Lee, A.S.; Hellinger, W.C.; Kaplan, J. Vertebral Aspergillus Osteomyelitis and Acute Diskitis in Patients With Chronic Obstructive Pulmonary Disease. *Mayo Clin. Proc.* **1999**, 74, 579–583. <https://doi.org/10.4065/74.6.579>.
- 22a. Maselli, F.; Rossetini, G.; Viceconti, A.; Testa, M. Importance of screening in physical therapy: Vertebral fracture of thoracolumbar junction in a recreational runner. *BMJ Case Rep.* **2019**, 12, e229987. <https://doi.org/10.1136/bcr-2019-229987>.
- 23a. Matsumura, A.; Ayuzawa, S.; Doi, M.; Enomoto, T.; Takeuchi, S.; Yoshii, Y.; Nose, T. Chronic progressive hematomyelia: Case reports and review of the literature. *Surg. Neurol.* **1999**, 51, 559–563. [https://doi.org/10.1016/s0090-3019\(97\)00442-4](https://doi.org/10.1016/s0090-3019(97)00442-4).
- 24a. McAree, B.J.; E. O'Donnell, M.; Boyd, C.; Spence, R.A.; Lee, B.; Soong, C.V. Inferior Vena Cava Thrombosis in Young Adults—A review of two cases. *Ulster Med. J.* **2009**, 78, 129–133.
- 25a. Panwar, N.; Purohit, D.K.; Sharma, S.; Chopra, S. Symptomatic Thoracic Intramedullary Arachnoid Cyst: “A Rare Entity” Report of Two Cases with Short Review of Literature. *J. Neurosci. Rural. Pract.* **2019**, 10, 306–311. [https://doi.org/10.4103/jnrp.jnrp\\_246\\_18](https://doi.org/10.4103/jnrp.jnrp_246_18).
- 26a. Ross, M.D.; Elliott, R.L. Thoracic Spine Compression Fracture in a Patient With Back Pain. *J. Orthop. Sports Phys. Ther.* **2008**, 38, 214–214. <https://doi.org/10.2519/jospt.2008.0404>.
- 27a. Roxas, R.; Gallegos, L.; Bailitz, J. Rapid Detection of Aortic Occlusion With Emergency Ultrasonography. *Ann. Emerg. Med.* **2011**, 58, 21–23. <https://doi.org/10.1016/j.annemergmed.2010.09.001>.
- 28a. Stowell, T.; Cioffredi, W.; Greiner, A.; Cleland, J. Abdominal Differential Diagnosis in a Patient Referred to a Physical Therapy Clinic for Low Back Pain. *J. Orthop. Sports Phys. Ther.* **2005**, 35, 755–764. <https://doi.org/10.2519/jospt.2005.35.11.755>.
- 29a. Tzeng, C.-H.; Chen, W.-K.; Lu, H.-C.; Chen, H.-H.; Lee, K.-I.; Wu, Y.-S.; Lee, F.-Y. Challenges in the diagnosis of Boerhaave syndrome. *Medicine* **2020**, 99, e18765. <https://doi.org/10.1097/md.00000000000018765>.
