# Supplementary material for: Screening for Referral of Serious Pathology by Physical Examination Tests in Patients with Back or Chest Pain: A Systematic Review
Source: Int J Environ Res Public Health. 2022 Dec 7;19(24):16418. doi: 10.3390/ijerph192416418 (PMC9779291; doi:10.3390/ijerph192416418)
Supplement: Supplementary file 1 [file ijerph-19-16418-s001.zip]

Archive with 4 entries (4 files):
- Supplementary S1 for XML.pdf
- Supplementary S2 for XML.pdf
- Supplementary S3 for XML.pdf
- Supplementary S4 for XML.pdf
